# Supplementary material for: An improved de novo genome assembly of the common marmoset genome yields improved contiguity and increased mapping rates of sequence data
Source: PubMed Central journal article supplement (PMC7114785; doi:10.1186/s12864-020-6657-2), 2020-04-02
Supplement: 12864_2020_6657_MOESM1_ESM.pdf [file 12864_2020_6657_MOESM1_ESM.pdf]

## Parameters used for the tools

Canu version 1.4 (r8079 00bed61d95d4c54522170099a5e8c366f52997c6):

Commands and parameters

```
canu -assemble genomeSize=2.26G
```

Wtdbg version 1.2.8 (r1 20180529):

Commands and parameters

```
wtdbg: -i reads -fo m --tidy-reads 5000 -k 0 -p 21 -S 4 --rescue-low-cov-edges
```

```
wtdbg-cns: -i m.ctg.lay -fo m.ctg.lay.fa -c 0
```

```
kbm: -d m.ctg.lay.fa -i reads -k 0 -p 21 -S 4 -O 0 | best_kbm_hit.pl | awk '{print \\$6"\"$9"\"$10"\"$1"\"$2"\"$4"\"$5}' >m.map
```

```
map2dbgcns: m.ctg.lay.fa reads m.map >m.map.lay
```

```
wtdbg-cns: -l m.map.lay -fo m.map.fa -k 13 -c 3
```

Flye version 2.3.4:

Commands and parameters

```
Flye: --pacbio-raw reads -g 2.9g
```

SMARTdenovo (git commit 3d9c22e25bdf4caf6c08ea1acb41ee58e52f61a8):

Commands and parameters: default (with consensus generation)

Minimap (git commit 1cd6ae3bc7c7a6f9e7c03c0b7a93a12647bba244) and miniasm (git commit 17d5bd12290e0e8a48a5df5afaeaf4d171aa133):

Commands and parameters

```
Minimap: -Sw 5 -L 100 -m 0 reads reads >m.paf
```

```
Miniasm: -f reads m.paf >m.gfa
```

MECAT (git commit 3898797d5d0ead78b14af65089f6be32263ca103):

Commands and parameters

```
mecat2pw: -j 0 -d reads -o m.pm.can -w.
```

```
mecat2cns: -i 0 m.pm.can reads corrected.fastq
```

```
extract_sequences: corrected.fastq corrected_25x.fastq 2900000000 25
```

```
mecat2canu: -assemble -p m -d m genomeSize=2.9G ErrorRate=0.02
```

```
maxMemory=350 maxThreads=30 useGrid=0 Overlapper=mecat2asmpw -pacbio-corrected corrected_25x.fastq.fasta
```

FALCON-integrate (git commit b22b63d6811b2be612db608b0fb62e6843f6c4c8):

Commands and parameters

```
length_cutoff_pr: 10000
```

```
length_cutoff: 10000
```

```
pa_HPCdaligner_option: -v -B24 -t16 -e.70 -l1000 -s500
```

```
ovlp_HPCdaligner_option: -v -B24 -t32 -h60 -e.96 -l500 -s500
```

```
pa_DBsplit_option: -x500 -s400
```

```
ovlp_DBsplit_option: -x500 -s400
```

```
falcon_sense_option: --output_multi --min_idt 0.70 --min_cov 4 --max_n_read 200 --n_core 6
```

overlap\_filtering\_setting: --max\_diff 100 --max\_cov 100 --min\_cov 4 --bestn 10 --n\_core 24

Quiver (from smrtanalysis-patch\_2.3.0.140936.p5):

Commands and parameters

minLength: 500

minSubReadLength: 500

readScore: 0.80

maxHits: 10

maxDivergence: 30

minAnchorSize: 12

placeRepeatsRandomly: True

pbalign\_opts: --seed=1 --minAccuracy=0.80 --minLength=500 --algorithmOptions='-useQuality'

RaGOO version 1.01:

ragoo: -b -m minimap2 assembly.fasta reference.fasta

Bwa version 0.7.12 (for alignment of Illumina reads before pilon):

Commands and parameters

mem: -l {500,700,2571,2731,7583,19833,39833} (for every PE and MP dataset)

Bwa mem was used for single end reads also. The sam files were sorted and indexed using samtools.

Pilon version 1.23:

Commands and parameters

pilon: --fix bases --vcf --changes --diploid

Pilon was executed with all PE and MP libraries for individual chromosomes.

Repeat Masking:

RepeatModeler version 1.0.11:

Commands and parameters

BuildDatabase: -name a -engine ncbi contigs.fa

RepeatModeler: -engine ncbi -database a >a.out

RepeatMasker version 4.0.8:

Commands and parameters

RepeatMasker: -dir A -xsmall -lib consensi.fa.classified assembly.fa
